# Supplementary material for: A mutant allele of ζ-carotene isomerase (Z-ISO) is associated with the yellow pigmentation of the “Pinalate” sweet orange mutant and reveals new insights into its role in fruit carotenogenesis
Source: PubMed Central journal article supplement (PMC6829850; doi:10.1186/s12870-019-2078-2), 2019-11-04
Supplement: 12870_2019_2078_MOESM1_ESM.pdf [file 12870_2019_2078_MOESM1_ESM.pdf]

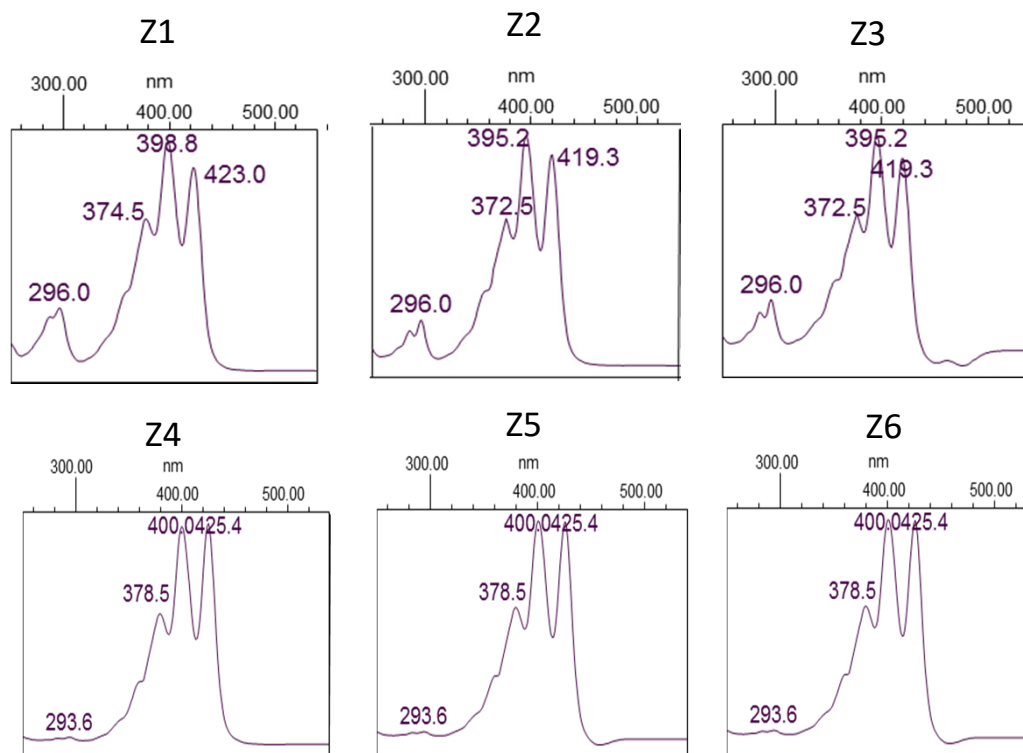

**Figure S1. Spectra of  $\zeta$ -carotene isomers identified in chromatograms of Pinalate carotenoid extracts.** Z1, 9,15,9'-tri-*cis*- $\zeta$ -carotene; Z2,  $\zeta$ -carotene isomer; Z3,  $\zeta$ -carotene isomer; Z4, 9,9'-di-*cis*- $\zeta$ -carotene; Z5,  $\zeta$ -carotene isomer; Z6,  $\zeta$ -carotene isomer.
