# Supplementary material for: A mutant allele of ζ-carotene isomerase (Z-ISO) is associated with the yellow pigmentation of the “Pinalate” sweet orange mutant and reveals new insights into its role in fruit carotenogenesis
Source: PubMed Central journal article supplement (PMC6829850; doi:10.1186/s12870-019-2078-2), 2019-11-04
Supplement: 12870_2019_2078_MOESM2_ESM.pdf [file 12870_2019_2078_MOESM2_ESM.pdf]

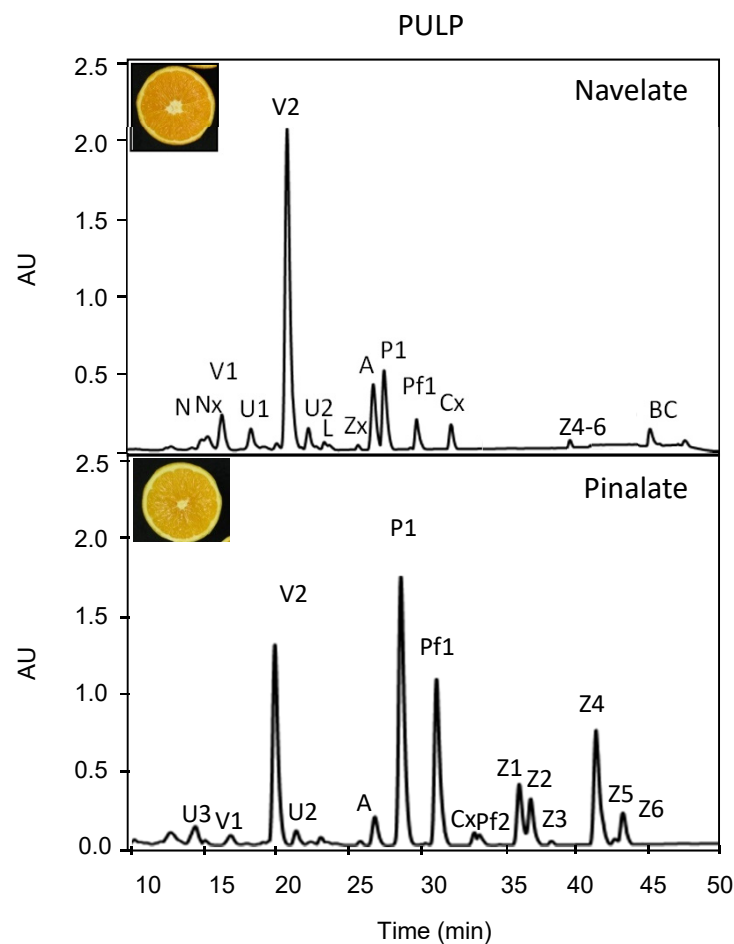

**Figure S2. Representative MaxPlots chromatograms obtained from pulp carotenoids extracts of Navelate (parental) and Pinalate (mutant).**; U1, unknown 401, 416, 446; U2, unknown 426,450; U3, 320,356,377; N, Neochrome s,432,458; Nx, neoxanthin; V1, all-*trans*-violaxanthin; V2, 9-*cis*-violaxanthin; L, lutein; Zx, zeaxanthin; A, antheraxanthin; P1, 15-*cis*-Phytoene; Pf1, Phytofluene isomer; Pf2, Phytofluene isomer2; Cx,  $\beta$ -Cryptoxanthin; Z1, 9,15,9'-tri-*cis*- $\zeta$ -carotene; Z2,  $\zeta$ -carotene isomer; Z3,  $\zeta$ -carotene isomer; Z4, 9,9'-di-*cis*- $\zeta$ -carotene; Z5,  $\zeta$ -carotene isomer; Z6,  $\zeta$ -carotene isomer; BC,  $\beta$ -carotene.
