# Supplementary material for: A mutant allele of ζ-carotene isomerase (Z-ISO) is associated with the yellow pigmentation of the “Pinalate” sweet orange mutant and reveals new insights into its role in fruit carotenogenesis
Source: PubMed Central journal article supplement (PMC6829850; doi:10.1186/s12870-019-2078-2), 2019-11-04
Supplement: 12870_2019_2078_MOESM3_ESM.pdf [file 12870_2019_2078_MOESM3_ESM.pdf]

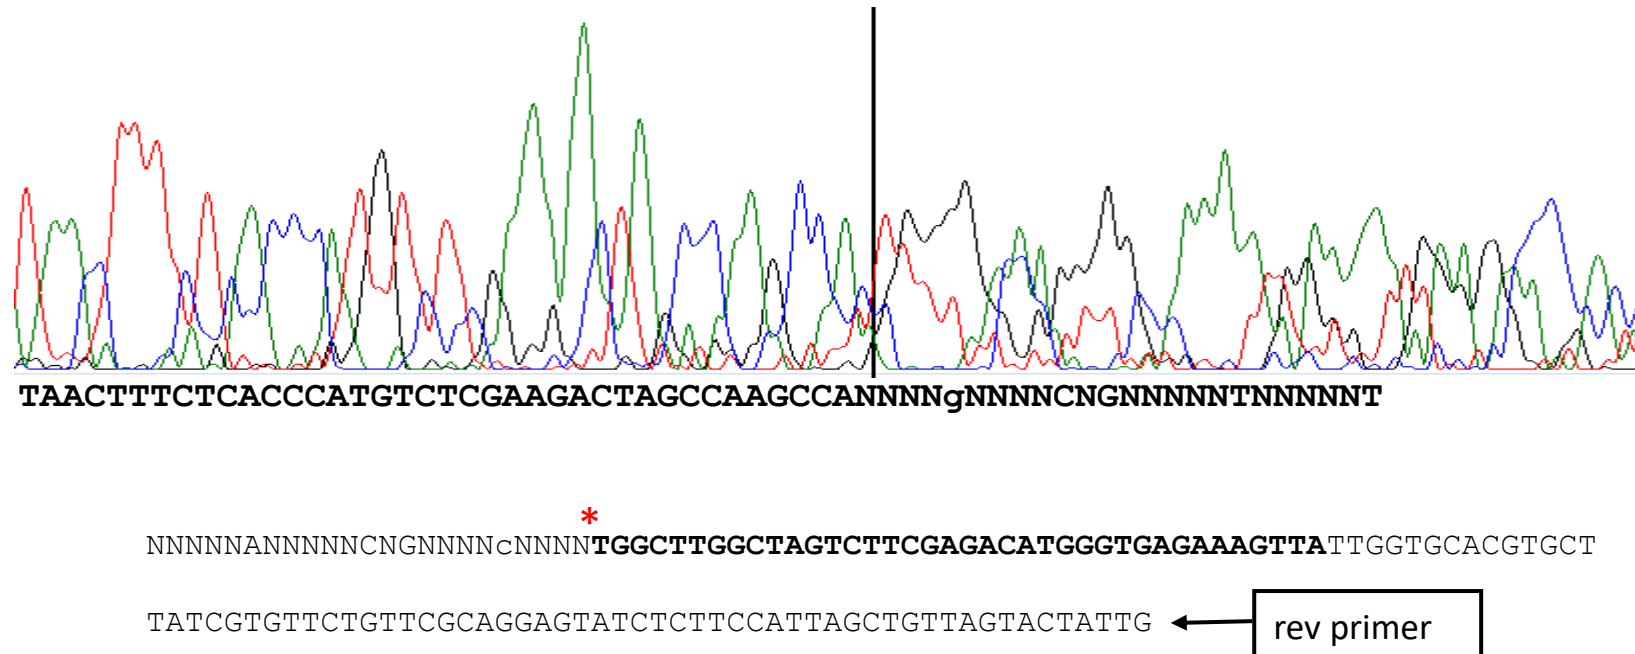

**Figure S3. Direct sequencing of genomic DNA of Z-ISO from Pinalate amplified by PCR.** The nucleotide sequencing with a reverse primer in Z-ISO trace up to the T insertion site (indicated with an \*) showing identical sequence between both alleles (bold letters). From the T insertion and on, the sequence trace became blurred in Pinalate genomic due to a frameshift in one allele.
