# Supplementary material for: A mutant allele of ζ-carotene isomerase (Z-ISO) is associated with the yellow pigmentation of the “Pinalate” sweet orange mutant and reveals new insights into its role in fruit carotenogenesis
Source: PubMed Central journal article supplement (PMC6829850; doi:10.1186/s12870-019-2078-2), 2019-11-04
Supplement: 12870_2019_2078_MOESM4_ESM.pdf [file 12870_2019_2078_MOESM4_ESM.pdf]

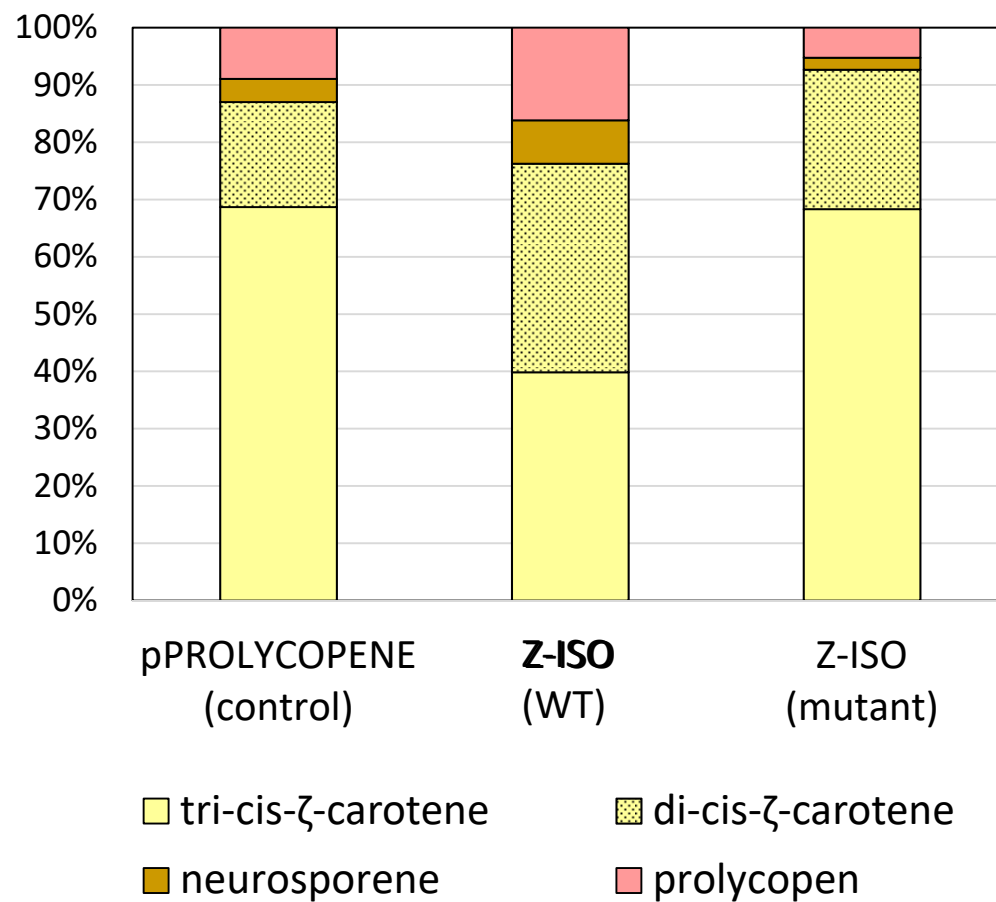

**Figure S4. Functional analysis of Citrus Z-ISO in *E.coli* pPROLYCOPENE strain.** Carotenoids composition in extracts from *E. coli* with pPROLYCOPENE plasmid and Citrus Z-ISO from WT or Pinalate (mutant) P5 and P6 cDNAs. *E. coli* with pPROLYCOPENE alone was used as control. Carotenoid analysis in *E. coli* cells was determined by HPLC-PAD as described in Material and Methods section.
